# Supplementary material for: Assessment of metabolome diversity in black and white pepper in response to autoclaving using MS- and NMR-based metabolomics and in relation to its remote and direct antimicrobial effects against food-borne pathogens
Source: Royal Society of Chemistry journal article supplement (doi:10.1039/d4ra00100a), 2024-01-01
Supplement: d4ra00100a1.pdf [file d4ra00100a1.pdf]

**Assessment of metabolome diversity in black and white pepper seeds in response to autoclaving using MS- and NMR-based metabolomics and in relation to its remote and direct antimicrobial effects against food borne pathogens**

**Mostafa H. Baky<sup>1a</sup>, Islam M. Kamal<sup>2a</sup>, Ludger A. Wessjohann<sup>3</sup>, Mohamed A. Farag<sup>4\*</sup>**

*<sup>1</sup>Department of Pharmacognosy, Faculty of pharmacy, Egyptian Russian University, Badr city, 11829, Cairo, Egypt.*

*<sup>2</sup>Microbiology and Immunology department, Faculty of Pharmacy, Cairo University, 11562 Cairo, Egypt.*

*<sup>3</sup>Department of Bioorganic Chemistry, Leibniz Institute of Plant Biochemistry (IPB), Weinberg 3, 06120, Halle (Saale), Germany*

*<sup>4</sup> Pharmacognosy Department, College of Pharmacy, Cairo University, 11562 Cairo, Egypt.*

*<sup>a</sup>Equal contribution*

\*Corresponding author at: Cairo University, College of Pharmacy, Department of Pharmacognosy, Egypt.

E-mail addresses: [mohamed.farag@pharma.cu.edu.eg](mailto:mohamed.farag@pharma.cu.edu.eg), (M.A. Farag).

**Table S1: Vapor-phase antimicrobial activity of the tested ground pepper n=3, Average ± SD**

| Vapor-phase minimum inhibitory concentration (VP-MIC) mg/mL |                    |                                       |                                   |                                        |                             |                                |                                    |                                        |                         |
|-------------------------------------------------------------|--------------------|---------------------------------------|-----------------------------------|----------------------------------------|-----------------------------|--------------------------------|------------------------------------|----------------------------------------|-------------------------|
|                                                             | <i>MRSA USA300</i> | <i>Acinetobacter baumannii AB5075</i> | <i>Salmonella typhi ATCC35664</i> | <i>Enterococcus faecalis ATCC19433</i> | <i>Enterobacter cloacae</i> | <i>Escherichia coli ATCC87</i> | <i>Pseudomonas aeruginosa PAO1</i> | <i>Klebsiella pneumoniae ATCC13883</i> | <i>Candida albicans</i> |
| <b>White pepper</b>                                         | 33.3 ± 11.5        | 40 ± 0                                | 33.3 ± 11.5                       | 26.6 ± 11.5                            | 20 ± 0                      | -                              | 16.4 ± 6.1                         | -                                      | -                       |
| <b>White pepper (autoclaved)</b>                            | LA                 | LA                                    | 40 ± 0                            | LA                                     | LA                          | -                              | 40 ± 0                             | -                                      | -                       |
| <b>Black pepper</b>                                         | 26.6 ± 11.5        | 40 ± 0                                | 23.1 ± 15.5                       | 16.4 ± 6.1                             | 12.9 ± 6.1                  | -                              | 12.9 ± 6.1                         | -                                      | -                       |
| <b>Black pepper (autoclaved)</b>                            | LA                 | LA                                    | LA                                | LA                                     | LA                          | -                              | 40 ± 0                             | -                                      | -                       |

(-) indicates that there was no antimicrobial activity detected under the tested conditions

(LA) Indicates the loss of activity after autoclaving.

**Table S2: Minimum inhibitory concentration of pepper methanol extracts using microdilution method, n=3, Av±SD.**

| Minimum inhibitory concentration (MIC) mg/mL |                    |                                       |                                   |                                        |                             |                                    |
|----------------------------------------------|--------------------|---------------------------------------|-----------------------------------|----------------------------------------|-----------------------------|------------------------------------|
|                                              | <i>MRSA USA300</i> | <i>Acinetobacter baumannii AB5075</i> | <i>Salmonella typhi ATCC35664</i> | <i>Enterococcus faecalis ATCC19433</i> | <i>Enterobacter cloacae</i> | <i>Pseudomonas aeruginosa PAO1</i> |
|                                              |                    |                                       |                                   |                                        |                             |                                    |

---

|                                 |           |             |          |            |            |            |
|---------------------------------|-----------|-------------|----------|------------|------------|------------|
| <b>White pepper<br/>extract</b> | 6.6 ± 2.8 | 26.6 ± 11.5 | 33.3 ± 0 | 16.6 ± 5.7 | 11.6 ± 7.6 | 20 ± 0     |
| <b>Black pepper<br/>extract</b> | 2.9 ± 1.9 | 20.0        | 33.3 ± 0 | 13.3 ± 5.7 | 11.6 ± 7.6 | 16.6 ± 5.7 |

---

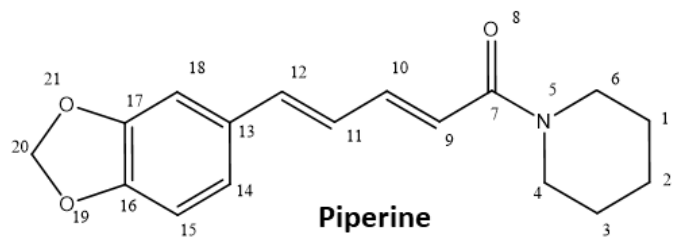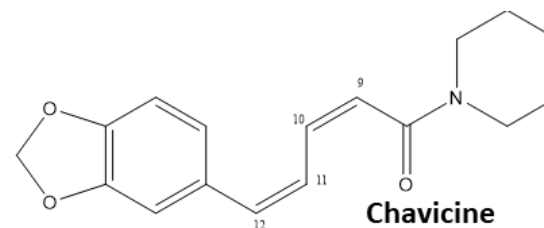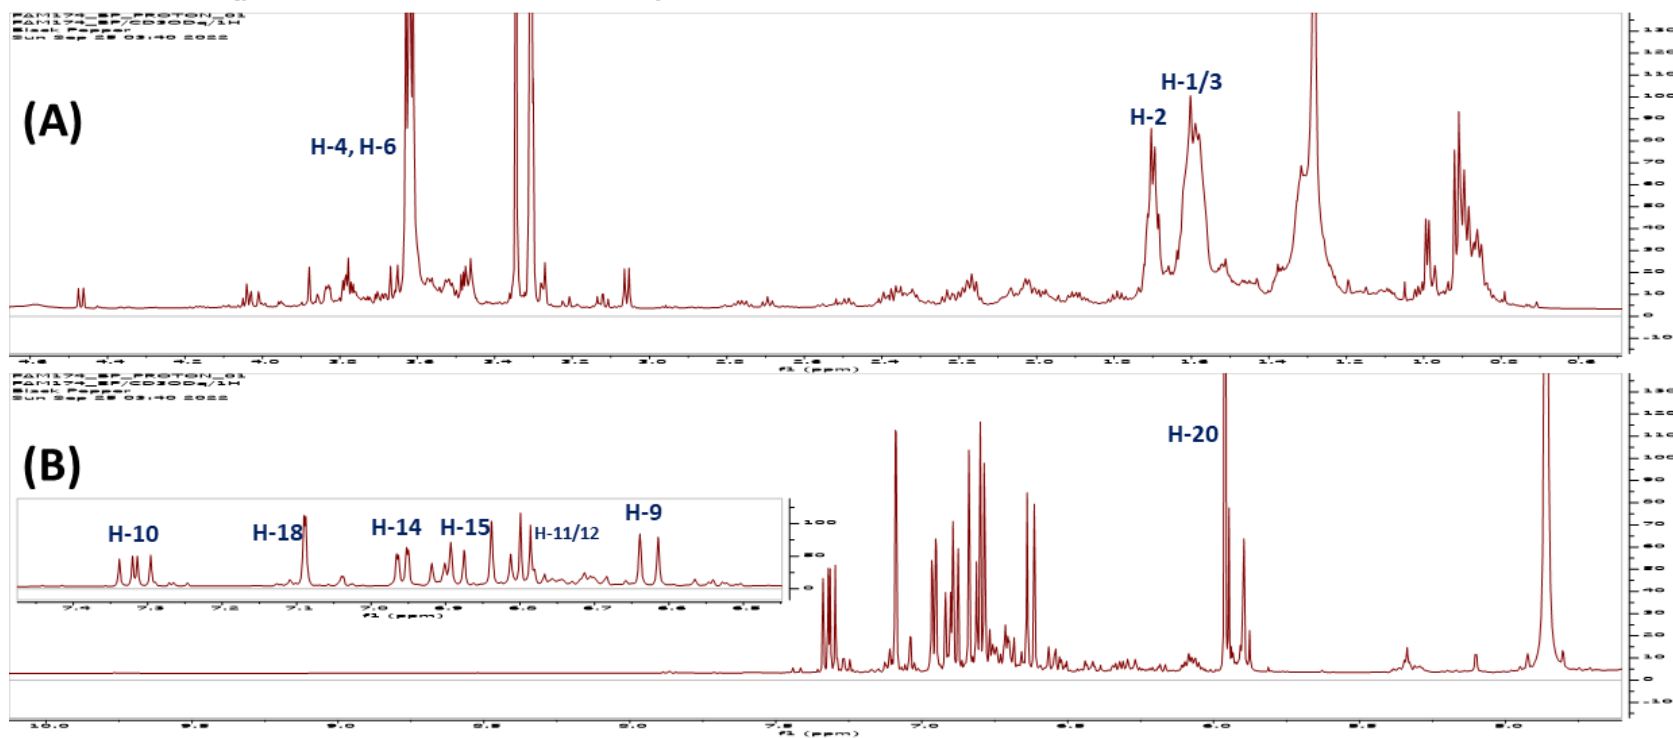

**Figure S1.** Signal assignment of the  $^1\text{H}$ -NMR markers for piperine alkaloid

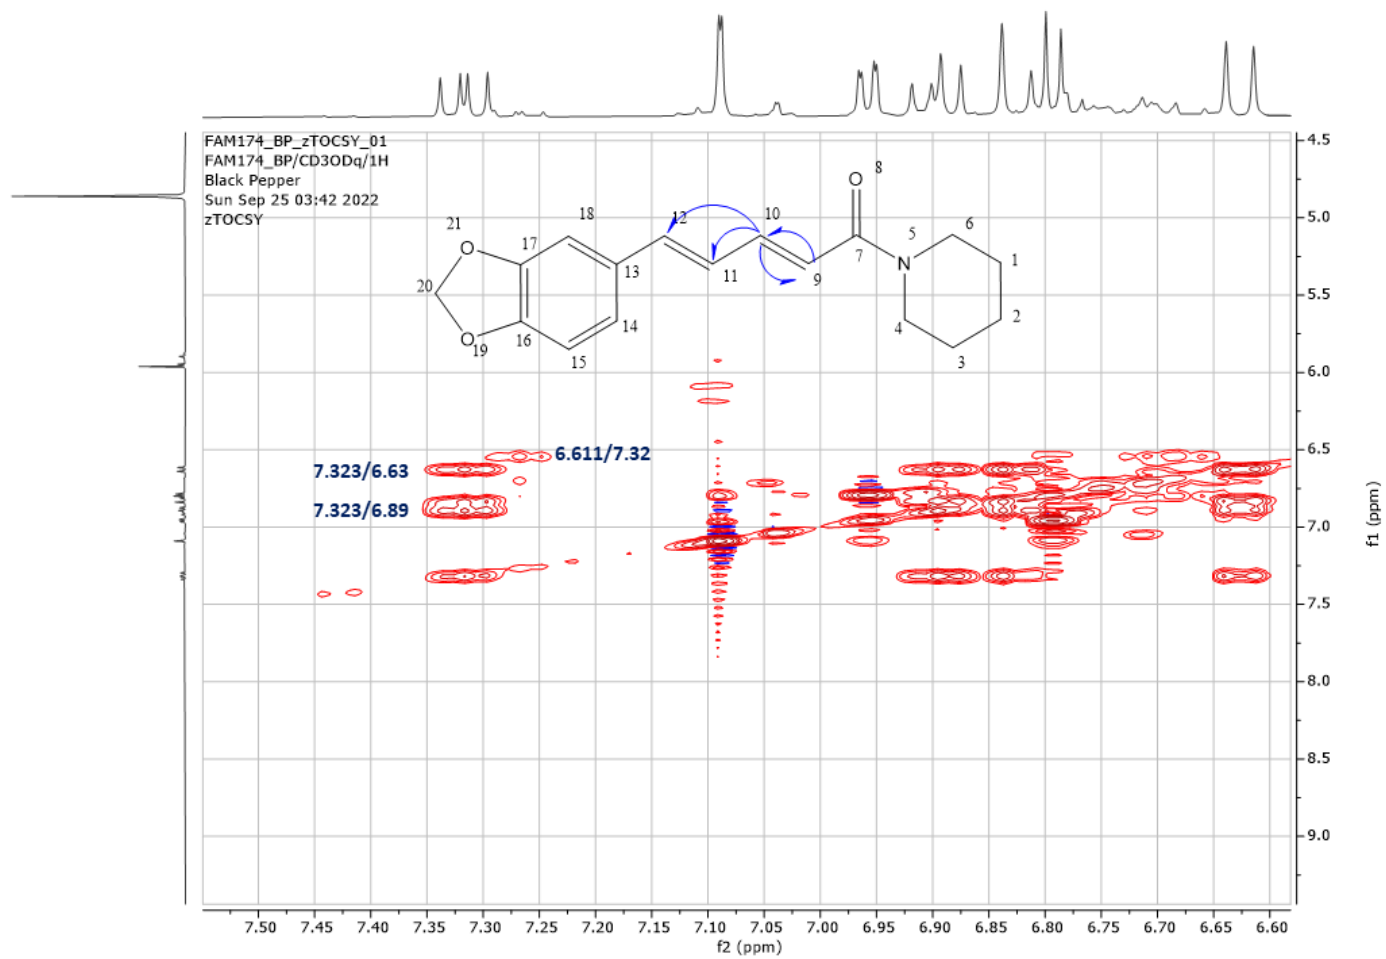

Figure S2.  $^1\text{H}$ - $^1\text{H}$  correlations observed in the TOCSY spectrum for piperine

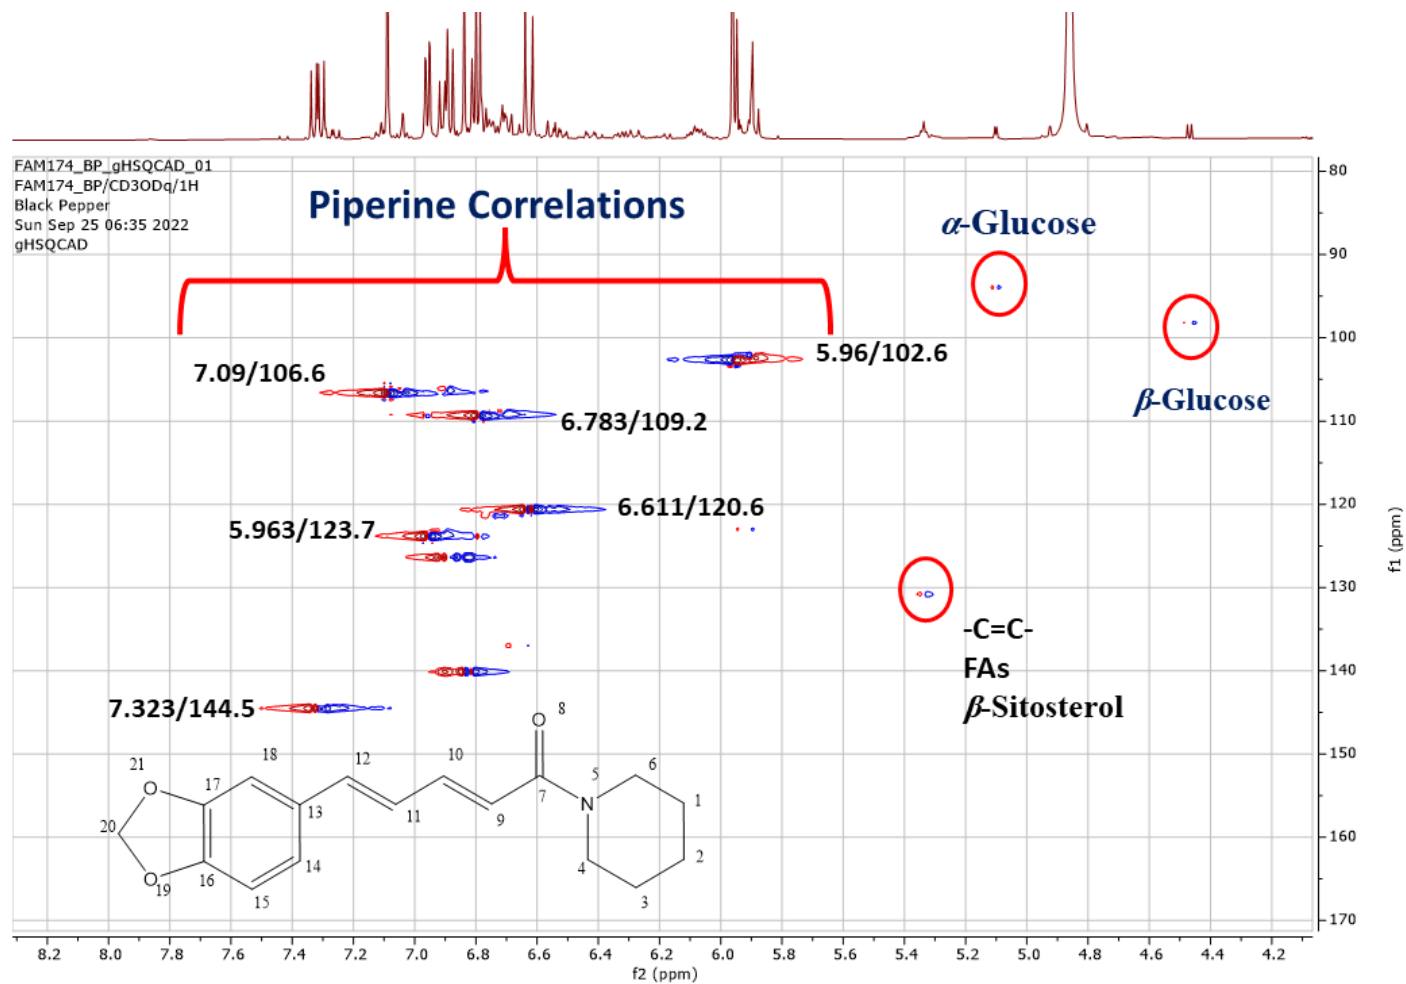

**Figure S3.**  $^1\text{H}$ - $^{13}\text{C}$  correlations observed in the HSQC spectrum for piperine

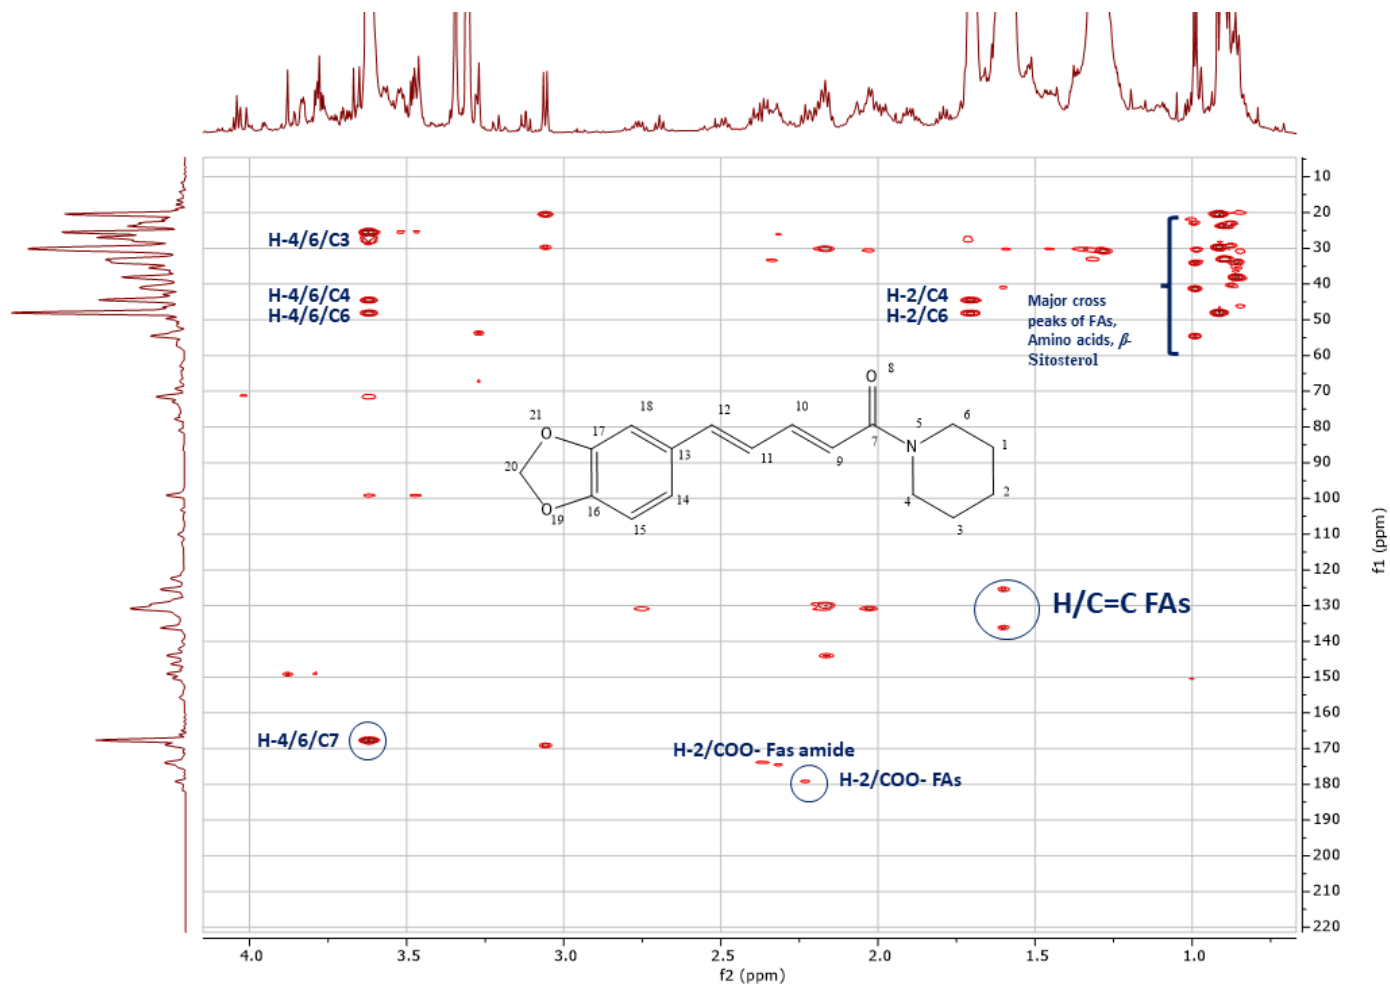

Figure S4.  $^1\text{H}$ - $^{13}\text{C}$  correlations observed in the HMBC spectrum identified metabolites

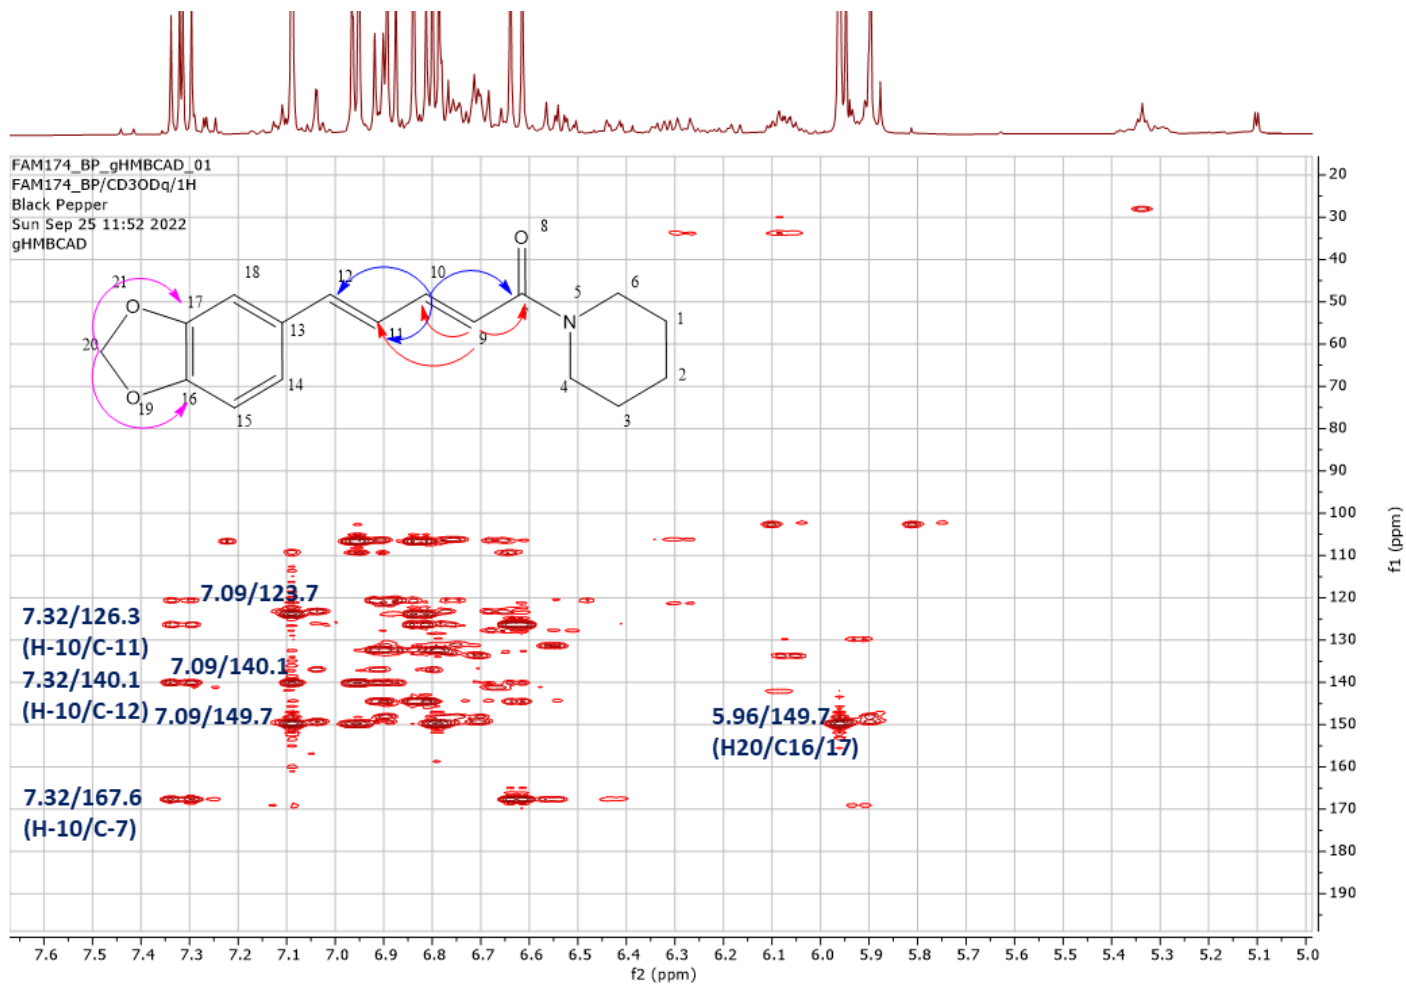

Figure S5.  $^1\text{H}$ - $^{13}\text{C}$  correlations observed in the HMBC spectrum for piperine



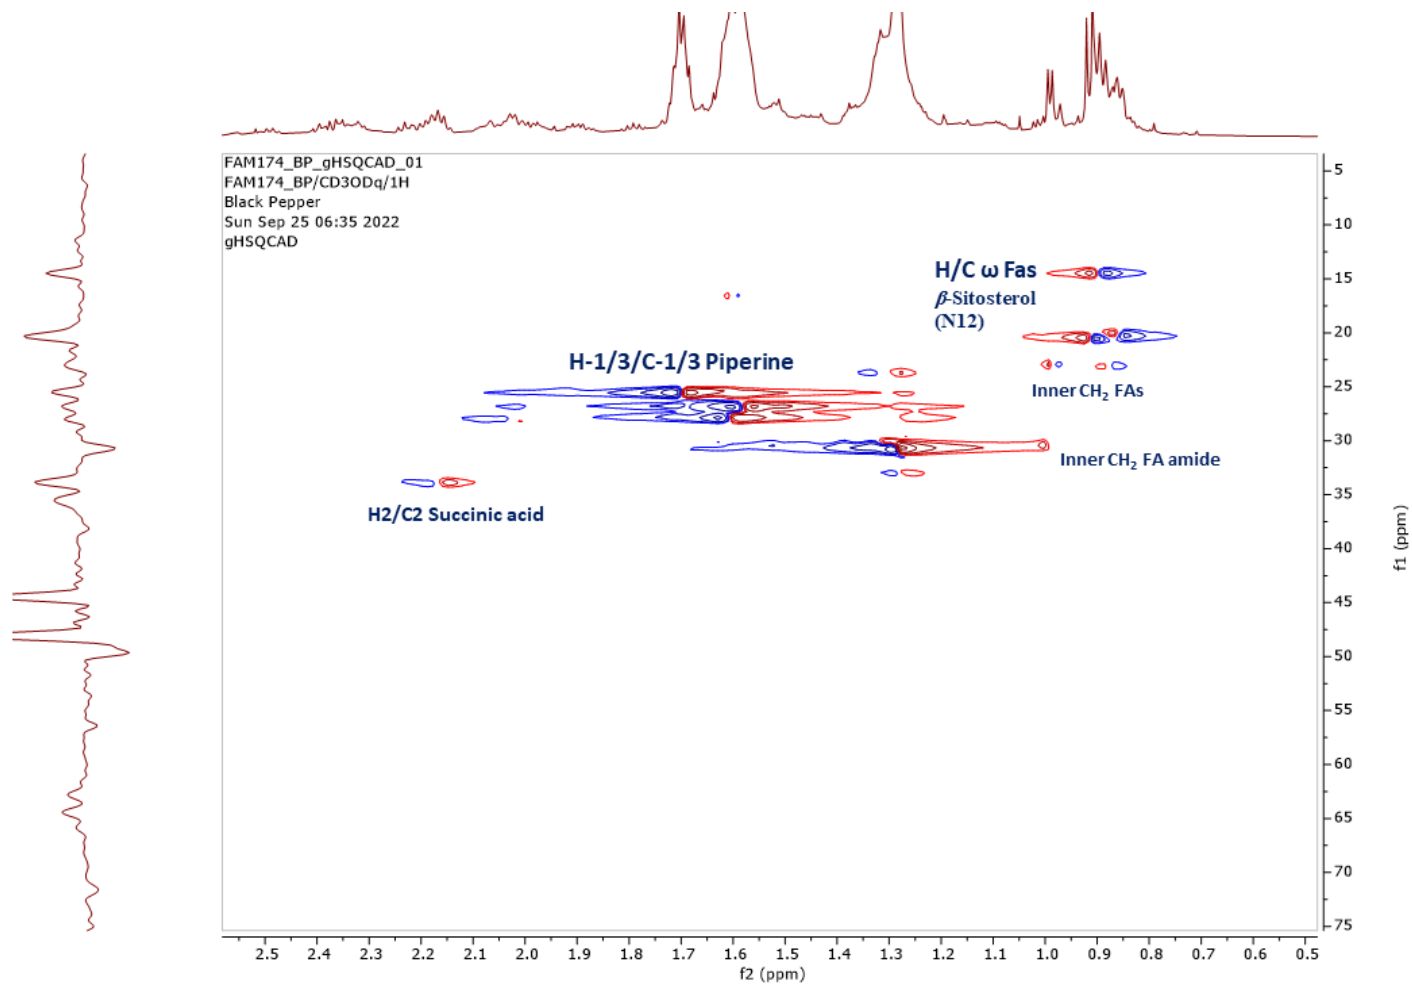

**Figure S6.** <sup>1</sup>H-<sup>13</sup>C correlations observed in the HSQC spectrum for major primary metabolites

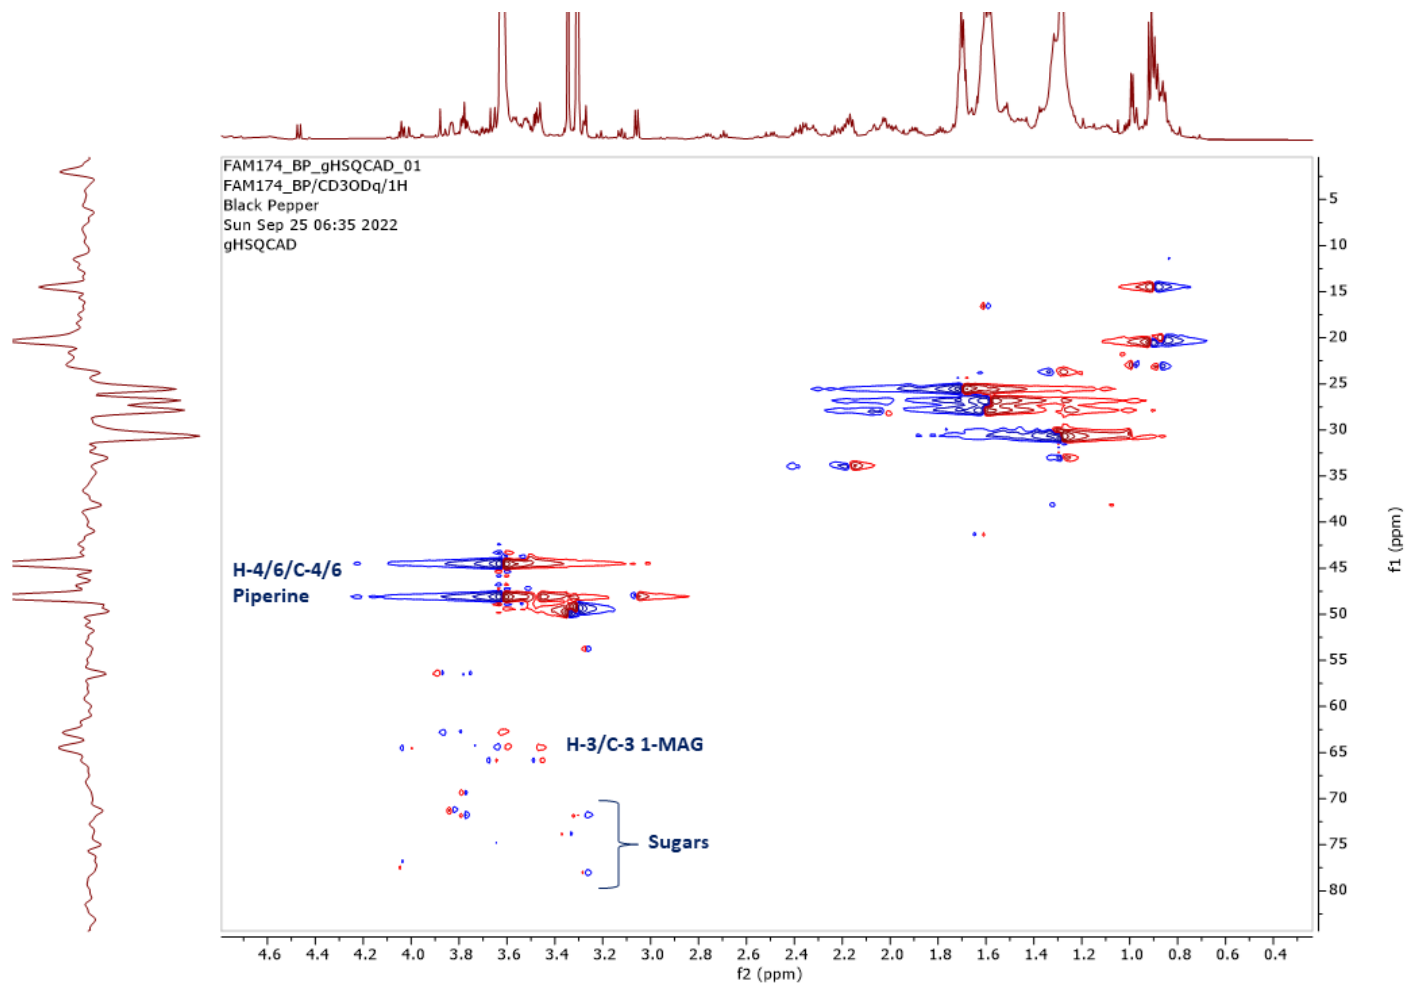

**Figure S7.** <sup>1</sup>H-<sup>13</sup>C correlations observed in the HSQC spectrum for major primary metabolites

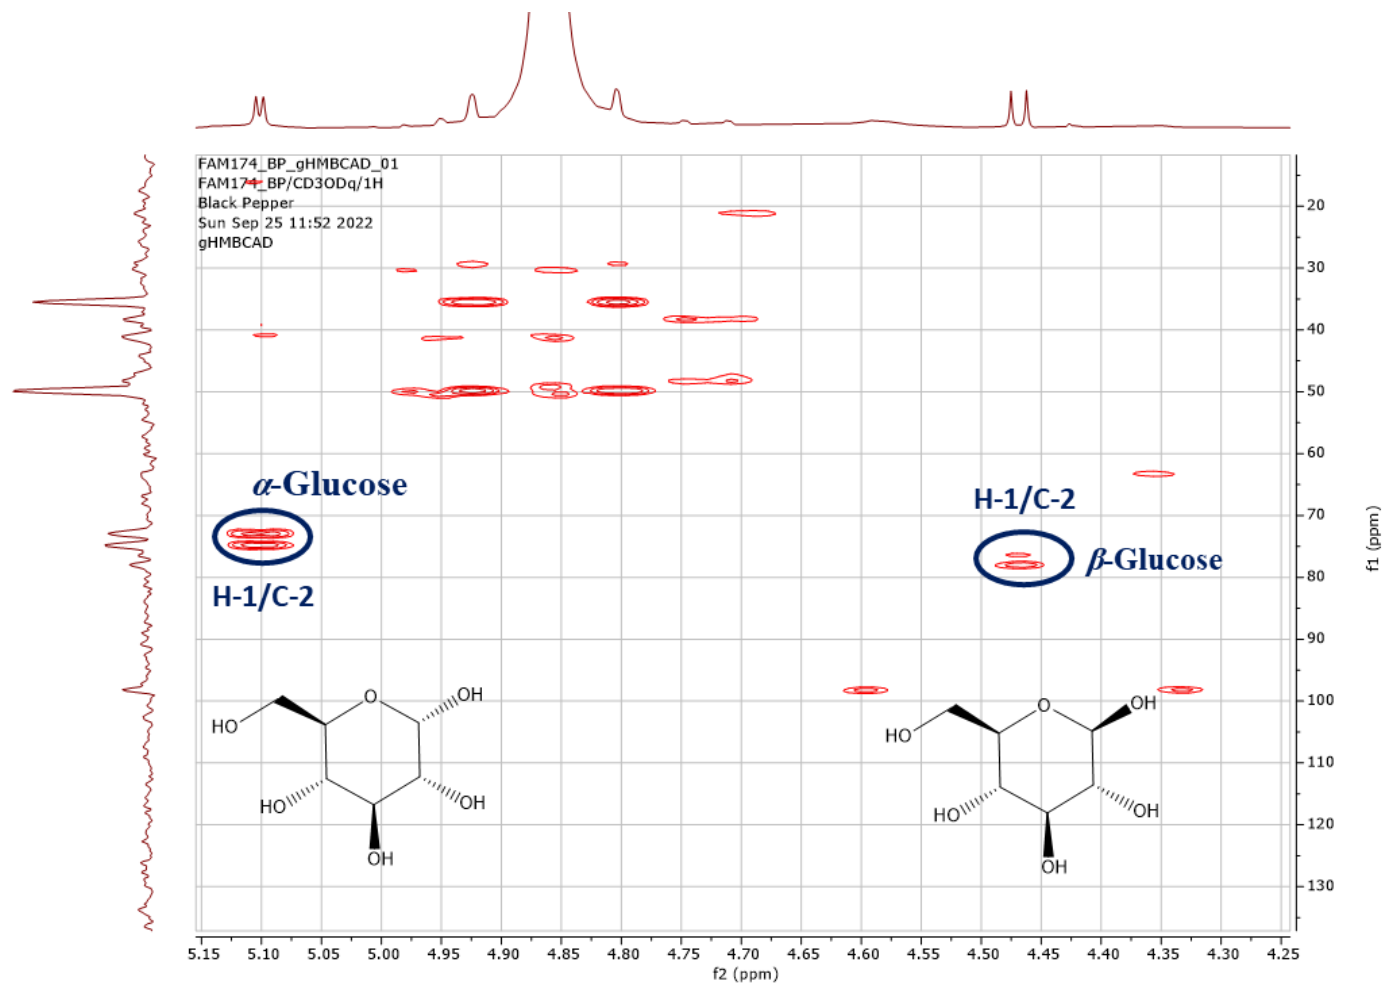

**Figure S8.**  $^1\text{H}$ - $^{13}\text{C}$  correlations observed in the HMBC spectrum for major primary metabolites

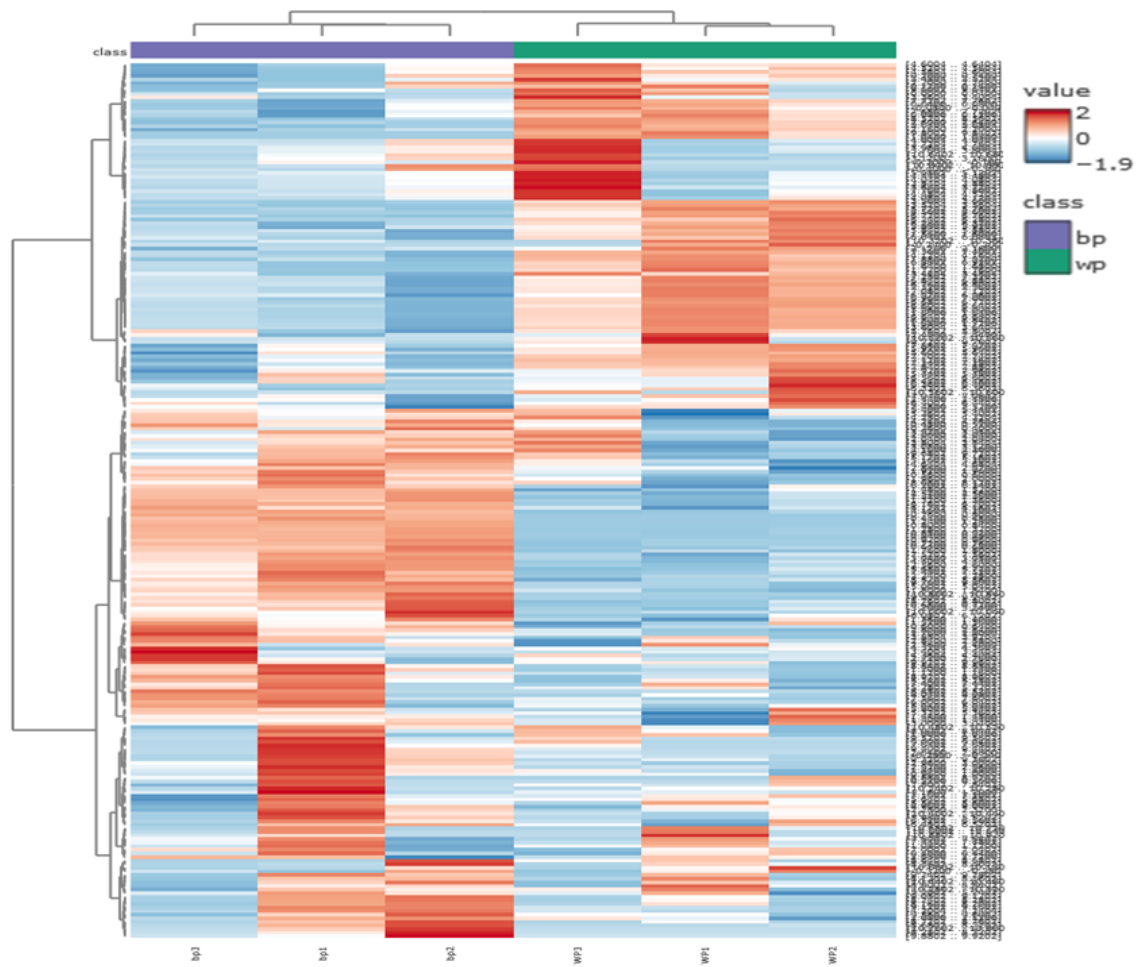

**Figure S9.** A heat map for identified metabolites in black and white pepper as extracted from NMR Table 1

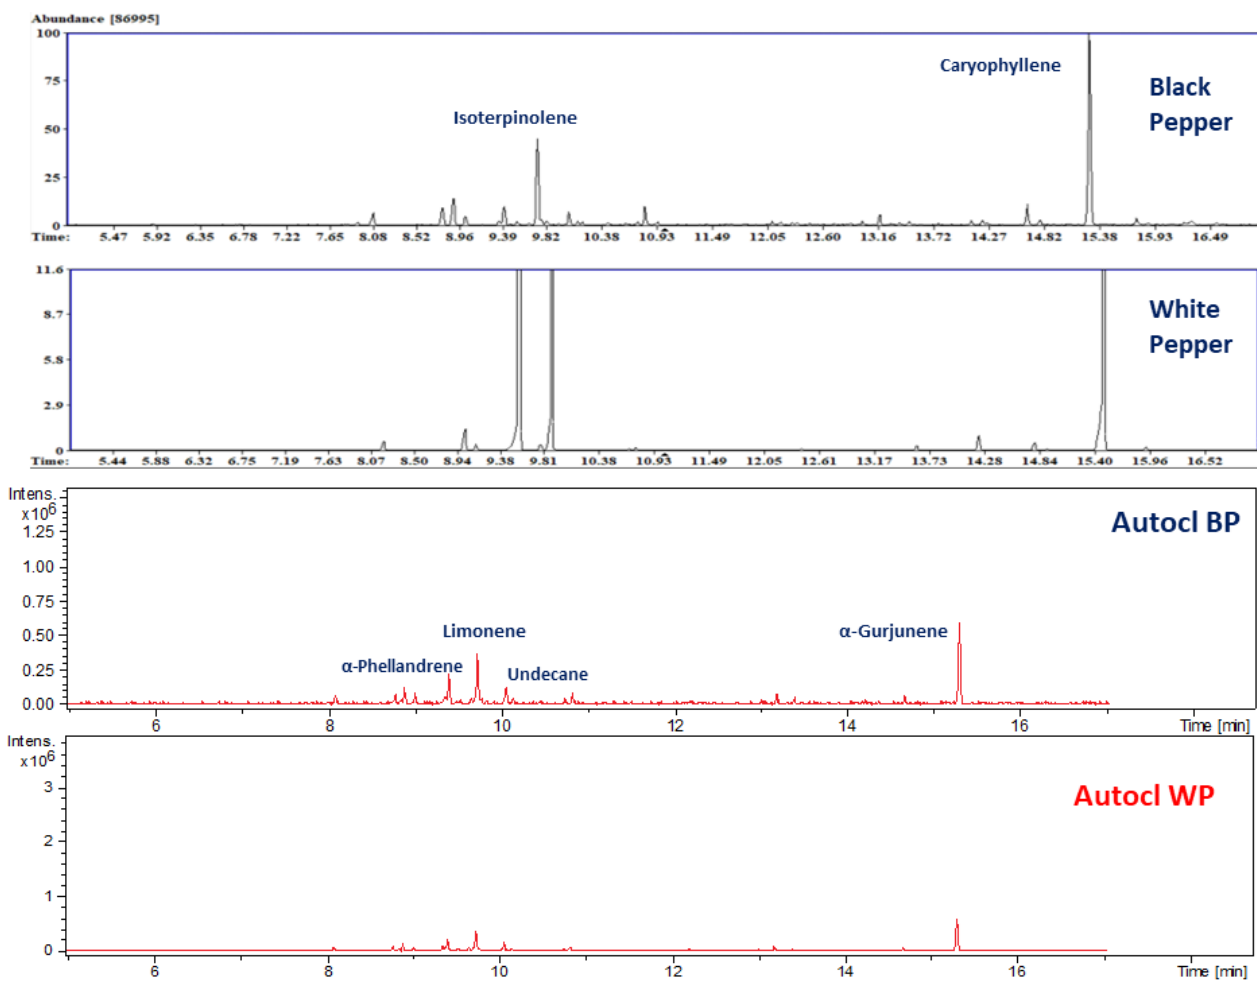

**Figure S10.** Representative GC–MS chromatograms of volatile constituents of black and white pepper.

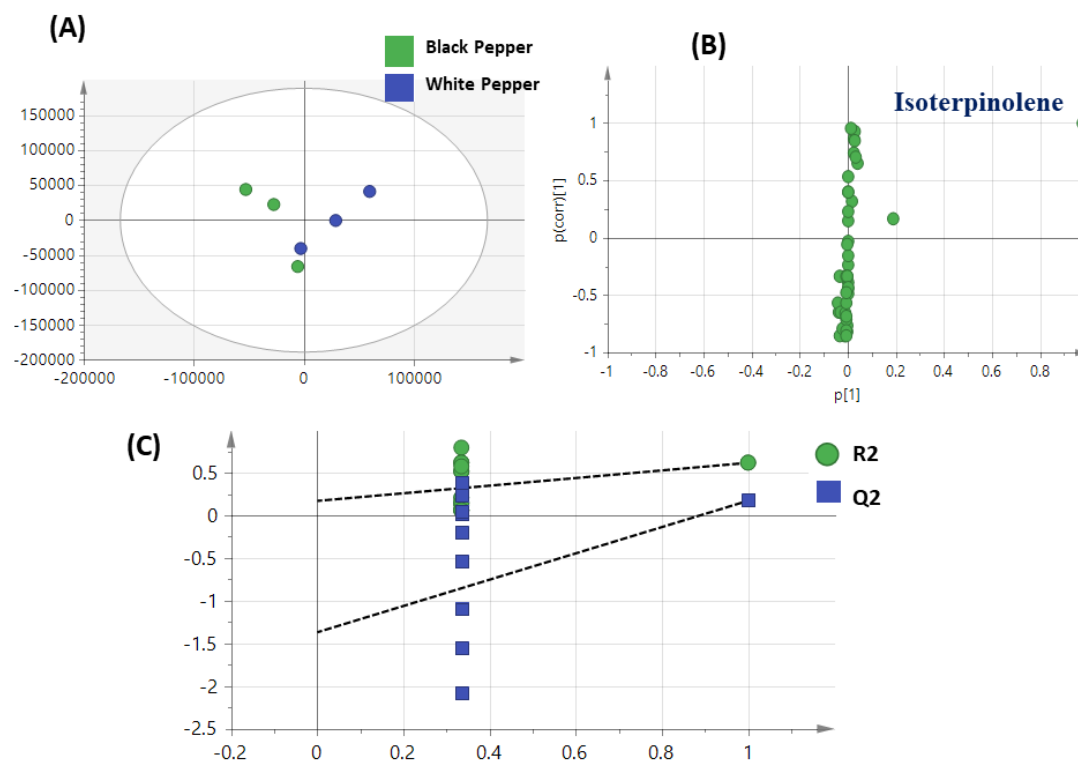

**Figure S11.** A) OPLS-DA score plot. B) Loading S-plots derived from modeling black pepper against white pepper as analyzed using SPME GC-MS showing the covariance  $p(1)$  against the correlation  $p(\text{cor})(1)$  of the variables of the discriminating component of the OPLS-DA model. C) Permutation plot (n=20).

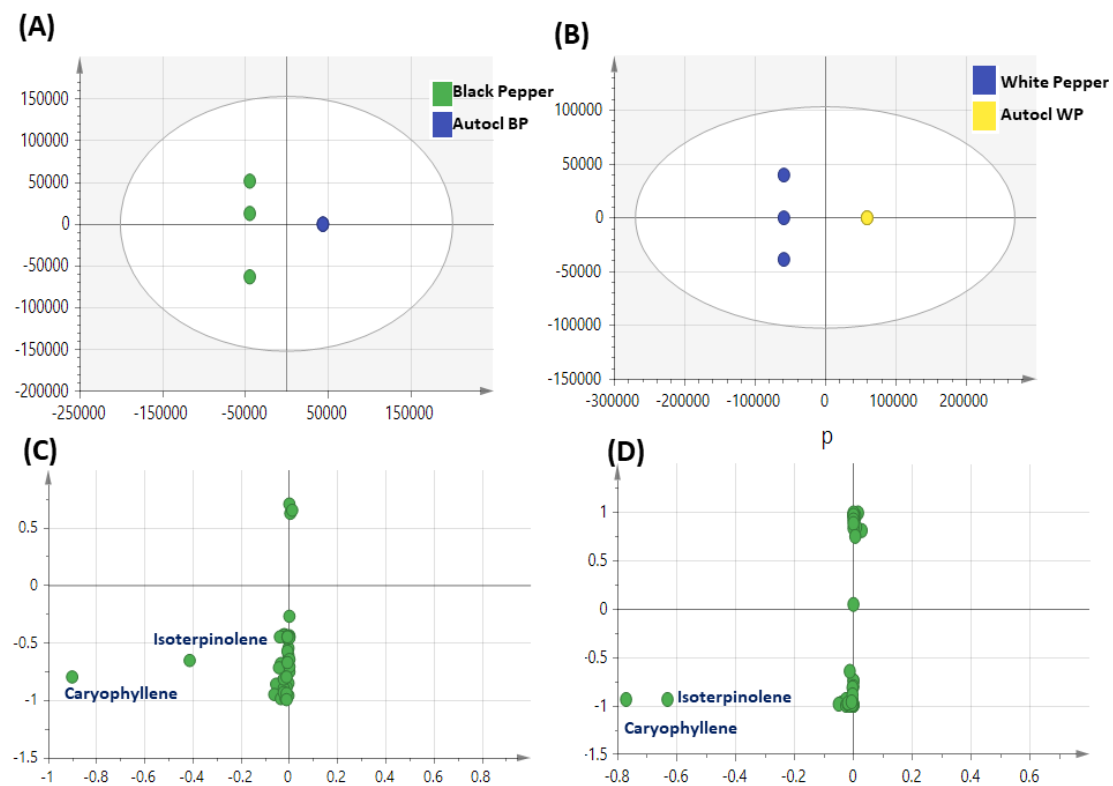

**Figure S12.** GC-MS-based OPLS-DA score plot derived from modeling volatile metabolites in raw and autoclaved black pepper (A), and raw and autoclaved white pepper (B) alongside their respective loading plots (C & D) Designated variables are highlighted and identifications are discussed in the text.

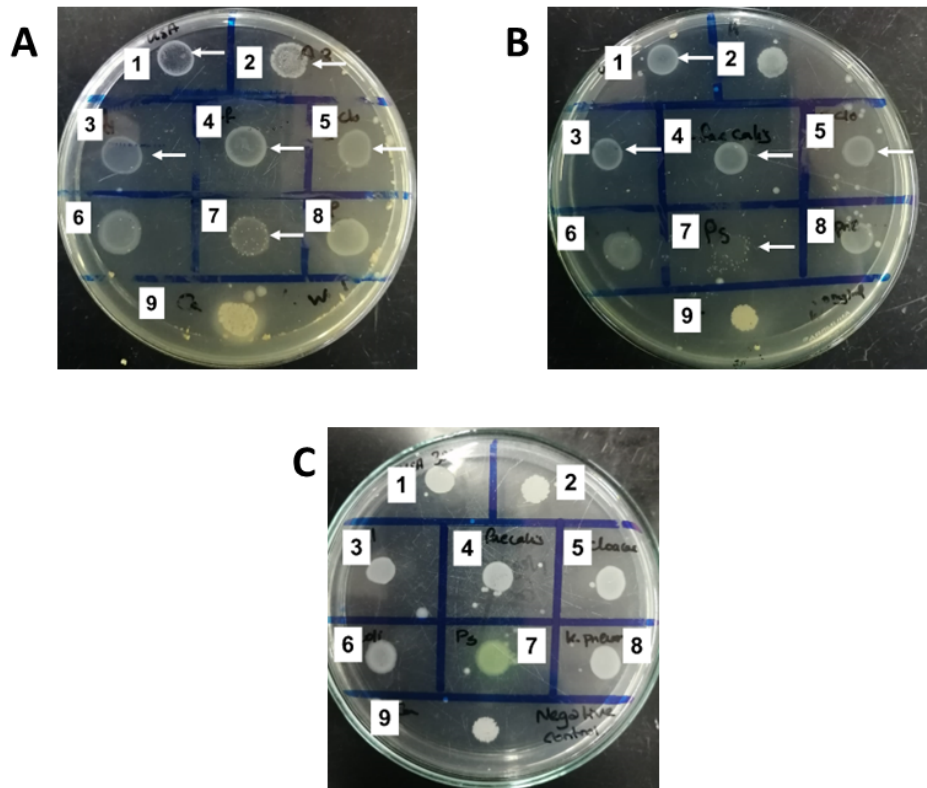

**Figure S13: Inverted petri dishes showing the vapor-phase MIC experiment for (A) ground white pepper, (B) ground Black pepper, (C) growth control.**

The cultures were spotted on MHA and numbered as follow: 1- MRSA *Staphylococcus aureus* USA 300, 2- *Acinetobacter baumannii* AB5075, 3- *Salmonella typhi* ATCC35664, 4- *Enterococcus faecalis* ATCC19433, 5- *Enterobacter cloacae*, 6- *Escherichia coli* ATCC87, 7- *Pseudomonas aeruginosa* PAO1, 8- *Klebsiella pneumoniae* ATCC13883, 9- *Candida albicans*. The cultured agar was upward while the ground pepper was placed downwards. The white arrows on the spots in (A) and (B) indicate a positive growth suppression. VP-MIC was determined as the least concentration of the tested sample that resulted in apparent growth inhibition of the tested microorganism when compared to the control.
